# Supplementary material for: Mutations in EPG5 are associated with a wide spectrum of neurodevelopmental and neurodegenerative disorders
Source: bioRxiv or medRxiv preprint supplement (doi:10.1101/2024.06.12.24308722), 2024-06-13

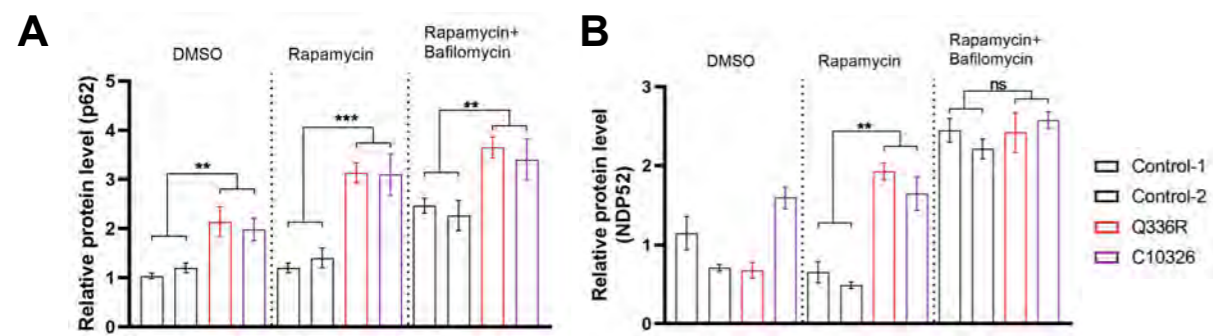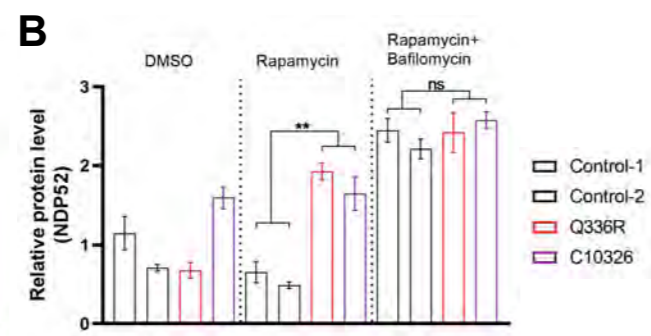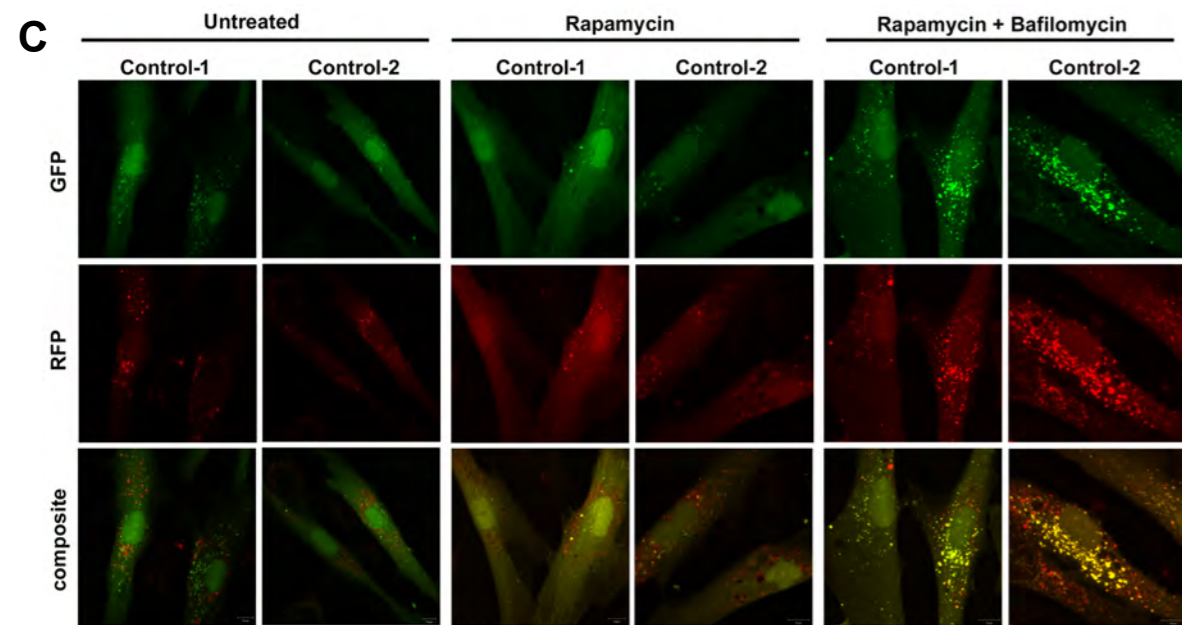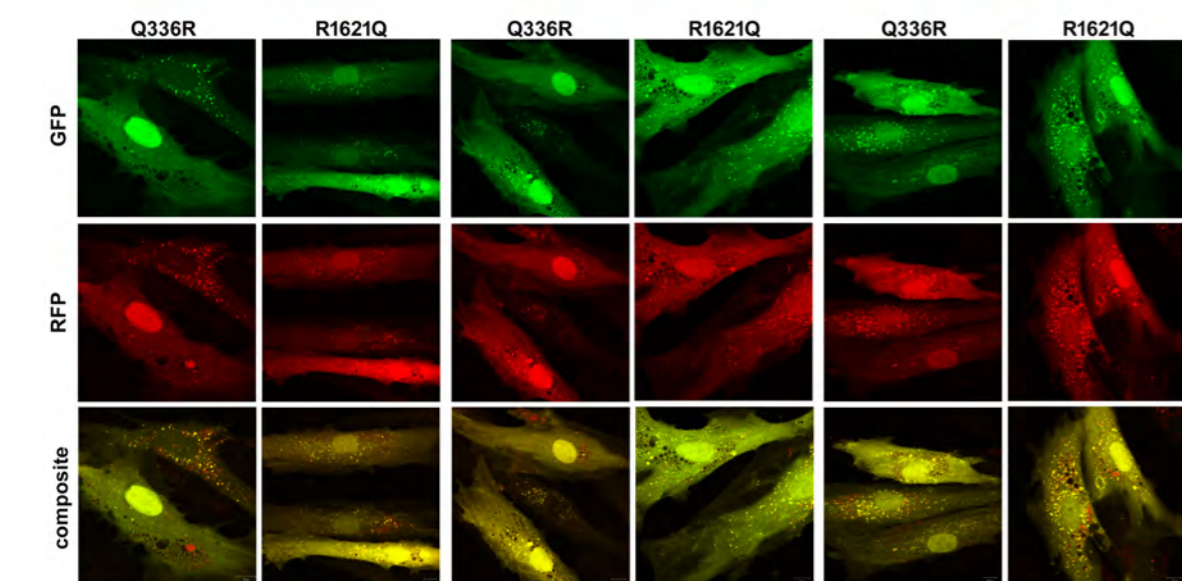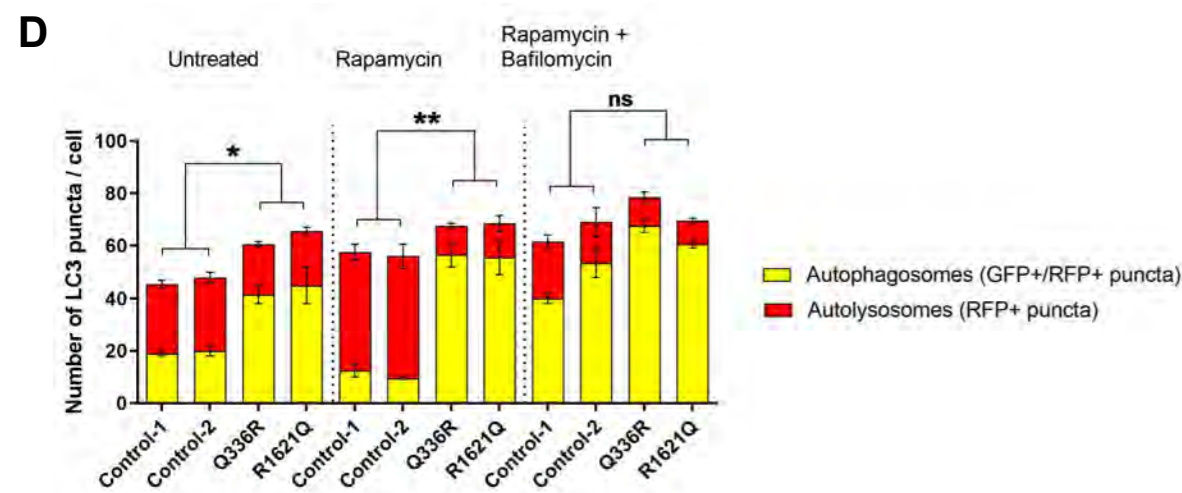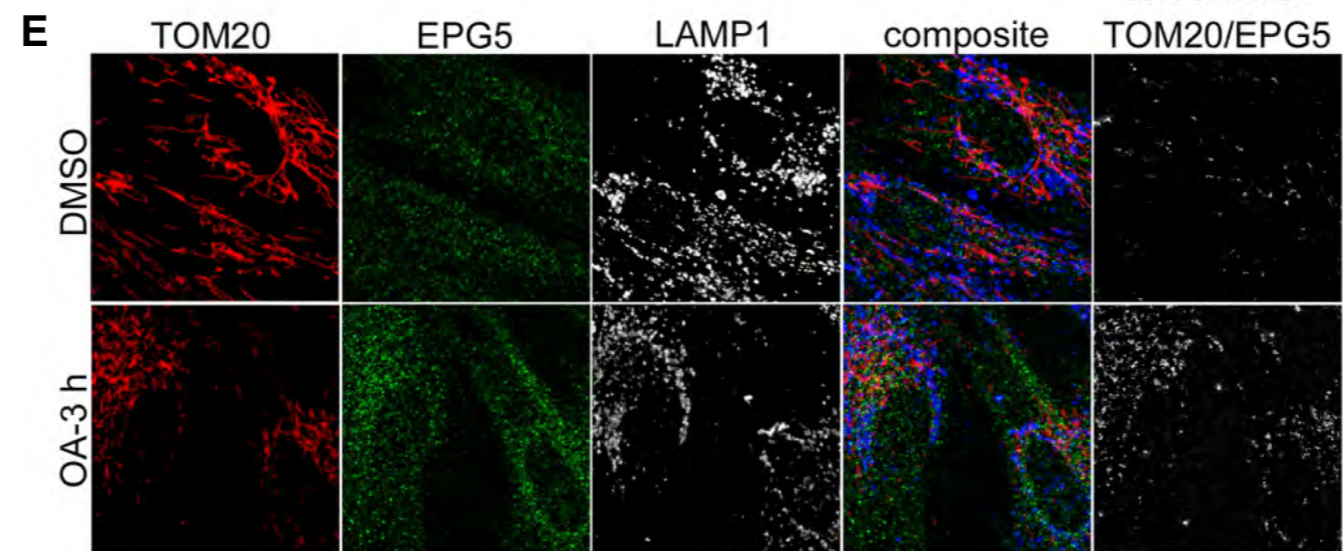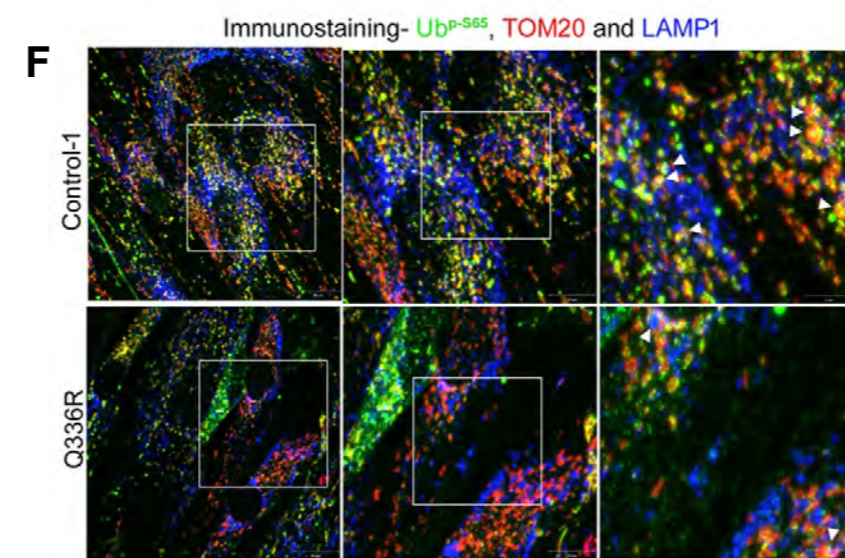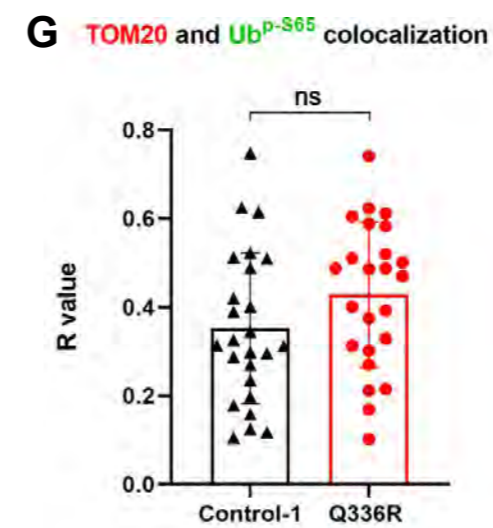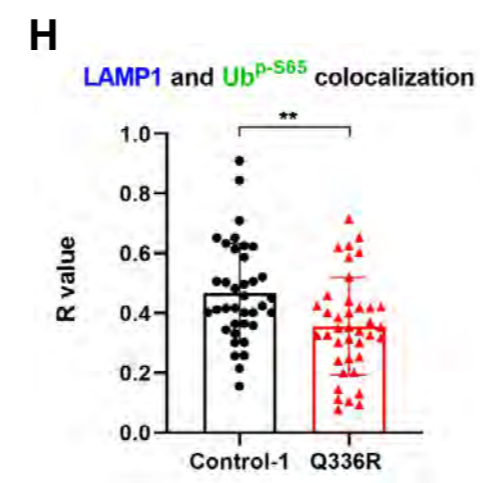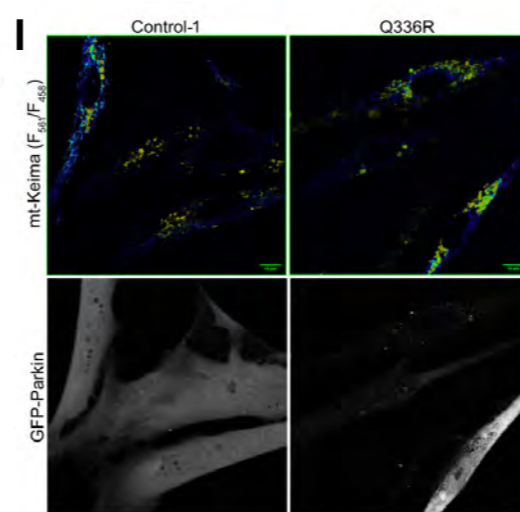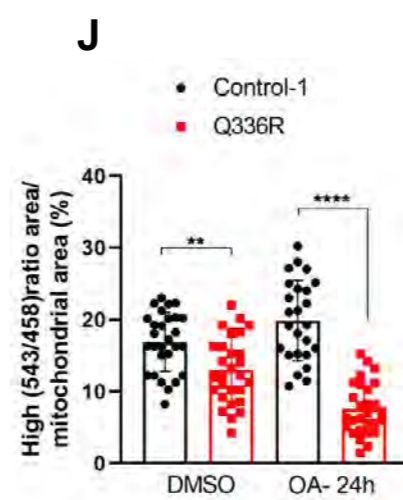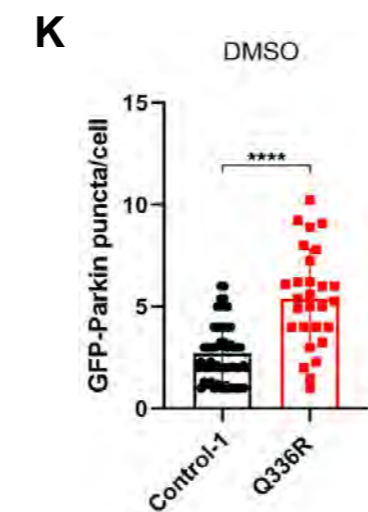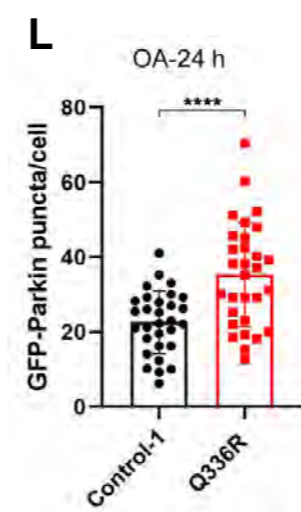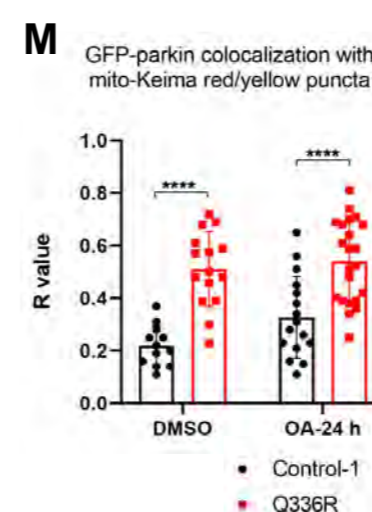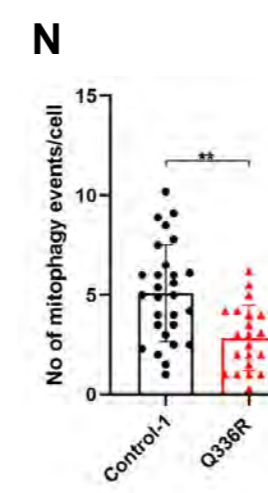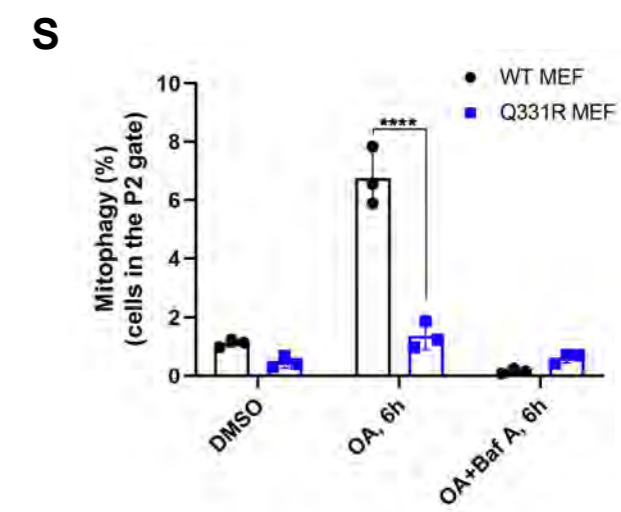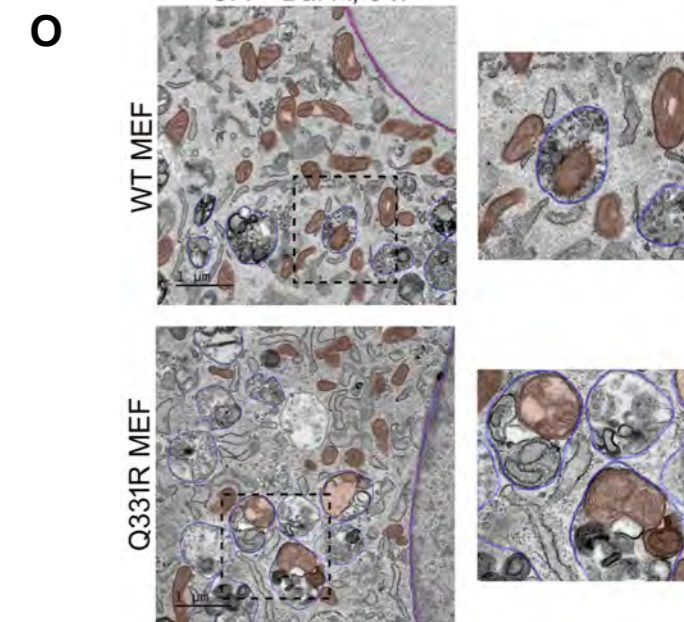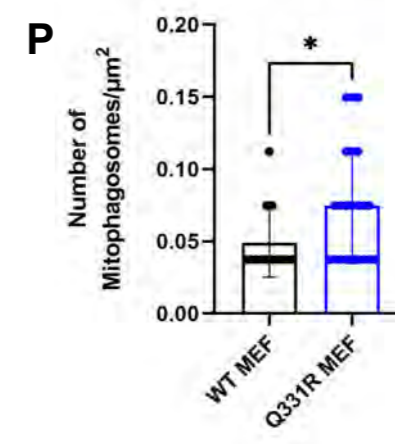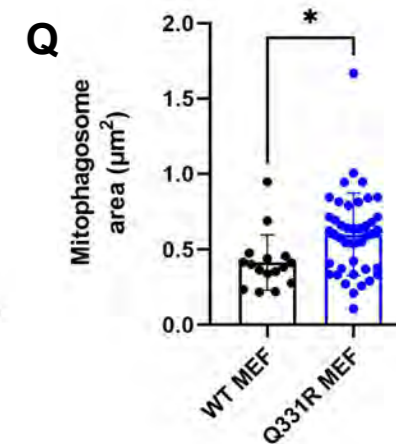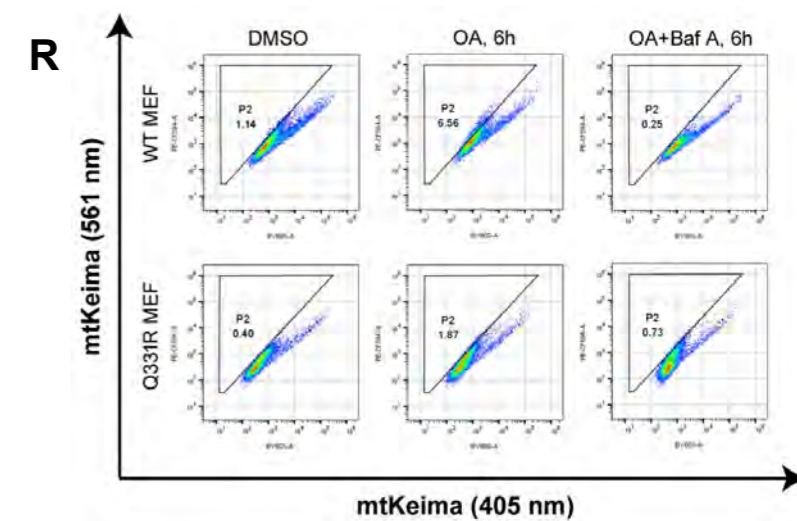

Supplement: Supplementary file [file media-5.pdf]
